# Supplementary material for: Individual quality as sensitivity to cysteine availability in a melanin-based honest signalling system
Source: Oxford University Press journal article supplement (doi:10.1242/jeb.160333), 2017-01-01
Supplement: jeb160333supp.pdf [file jeb160333supp.pdf]

## **Table S1**

[Click here to Download Table S1](#)
